# Supplementary material
Source: Research Square preprint supplement (doi:10.21203/rs.3.rs-9255411/v1)
Supplement: Supplementary file 1 [file af4e4b30374e8a0a2060c935.docx]

**STROBE Statement — Checklist for Cohort Studies**

**Mittal N, Mittal A. Modified HEART Score Validation — BLK-MAX ED, New Delhi. 2022–2023.**

International Journal of Emergency Medicine | Manuscript ID: a649d79b-a112-4e2b-9090-44be1b8bd503

*Reference: Vandenbroucke JP et al. Strengthening the Reporting of Observational Studies in Epidemiology (STROBE). Ann Intern Med. 2007;147(8):573–7.*

| **Section** | **Item** | **Recommendation** | **Location in Manuscript** |
| --- | --- | --- | --- |
| Title & Abstract | 1a | Indicate the study's design with a commonly used term in the title or the abstract | Title includes 'Prospective Observational Study'; Abstract structured per BMC guidelines. ✓ |
|  | 1b | Provide in the abstract an informative and balanced summary of what was done and what was found | Structured abstract: Background/Methods/Results/Conclusion. All key outcomes reported. ✓ |
| Introduction | 2 | Explain the scientific background and rationale for the investigation being reported | §1 Background: chest pain epidemiology, Indian CVD burden, DM prevalence, MHS derivation cited (refs 1–11). ✓ |
|  | 3 | State specific objectives, including any pre-specified hypotheses | §1 final paragraph: primary objective (MHS validation) and pre-specified secondary analysis (DM stratification) stated. ✓ |
| Methods – Study Design | 4 | Present key elements of study design early in the paper | §2.1: 'prospective observational cohort study' stated explicitly. ✓ |
| Methods – Setting | 5 | Describe the setting, locations, and relevant dates, including periods of recruitment, exposure, follow-up, and data collection | §2.1: BLK-MAX Super Specialty Hospital, Pusa Road, New Delhi; June 2022–November 2023 (18 months); ED caseload profile described. ✓ |
| Methods – Participants | 6a | Give the eligibility criteria, and the sources and methods of selection of participants | §2.2: Inclusion criteria (age ≥18, chest pain/equivalent, onset ≤7 days); exclusion criteria (trauma, malignancy, pregnancy, STEMI, AMA) stated. Consecutive enrolment. ✓ |
|  | 6b | For matched studies, give matching criteria and number of matched sets | N/A — not a matched study. ✓ |
| Methods – Variables | 7 | Clearly define all outcomes, exposures, predictors, potential confounders, and effect modifiers. Give diagnostic criteria if applicable | §2.3: MHS components (H,E,A,R,T) defined with scoring criteria. §2.4: 30-day MACE composite defined. Risk factors for R component listed. hs-cTnI reference range stated. ✓ |
| Methods – Data Sources | 8 | For each variable of interest, give sources of data and details of methods of assessment (measurement). Describe comparability of assessment methods if there is more than one group | §2.3: hs-cTnI reference range 0–34 pg/mL; ECG criteria for scoring defined. §2.5: SPSS v22 stated. ✓ |
| Methods – Bias | 9 | Describe any efforts taken to address potential sources of bias | §2.2: Consecutive enrolment to minimise selection bias. §4.5 Limitations: loss-to-follow-up bias acknowledged; interrater variability acknowledged; pre-hospital medication effect noted. ✓ |
| Methods – Study Size | 10 | Explain how the study size was arrived at | §2.3 Sample Size: based on Six et al. (2008) framework; 80% power, α=0.05; minimum 33 MACE events; MACE prevalence estimated 25%; required n=165. ✓ |
| Methods – Quantitative Variables | 11 | Explain how quantitative variables were handled in the analyses. If applicable, describe which groupings were chosen and why | §2.3: MHS total (0–10) categorised as Low/Medium/High per published thresholds. Threshold ≥4 as binary positive screen. Rationale: standard published cut-offs. ✓ |
| Methods – Statistical Methods | 12a | Describe all statistical methods, including those used to control for confounding | §2.5: Chi-squared, Fisher's exact, sensitivity/specificity/PPV/NPV (Wilson CIs), AUC-ROC, SPSS v22 stated. ✓ |
|  | 12b | Describe any methods used to examine subgroups and interactions | §2.5: Pre-specified secondary analysis: DM vs non-DM MACE rates across risk strata. ✓ |
|  | 12c | Explain how missing data were addressed | §4.5 Limitations: loss-to-follow-up for telephone follow-up acknowledged as potential bias. No imputation used. ✓ |
|  | 12d | If applicable, describe analytical methods taking account of sampling strategy | N/A — consecutive enrolment, no complex sampling. ✓ |
|  | 12e | Describe any sensitivity analyses | Not performed — single-centre observational study. Acknowledged as limitation. ✓ |
| Results – Participants | 13a | Report numbers of individuals at each stage of study | §3.1: 165 enrolled (97% of eligible); 8 declined consent; 4 met post-screening exclusion. ✓ |
|  | 13b | Give reasons for non-participation at each stage | §3.1: Reasons stated (declined consent, exclusion criteria met). ✓ |
|  | 13c | Consider use of a flow diagram | **Recommended — flow diagram not included. Consider adding as Figure.** |
| Results – Descriptive Data | 14a | Give characteristics of study participants and information on exposures and potential confounders | Table 1: age, sex, DM, MACE prevalence. §3.1 narrative. ✓ |
|  | 14b | Indicate number of participants with missing data for each variable of interest | **§4.5 Limitations: no formal missing data tracking; telephone follow-up loss noted. Partial.** |
| Results – Outcome Data | 15 | Report numbers of outcome events or summary measures over time | §3.2 and Table 2: MACE by risk stratum. §3.3 and Table 3: diagnostic performance. §3.5 Tables 4–5: DM stratification. ✓ |
| Results – Main Results | 16a | Give unadjusted estimates and, if applicable, confounder-adjusted estimates and their precision | Table 3: all diagnostic metrics with Wilson 95% CIs. Table 4: OR≈4.7 for DM vs non-DM. ✓ |
|  | 16b | Report category boundaries when continuous variables were categorized | §2.3: MHS categories: Low 0–3, Medium 4–6, High 7–10. Binary threshold ≥4. ✓ |
|  | 16c | If relevant, consider translating estimates of relative risk into absolute risk for a meaningful time period | §3.5: Absolute MACE rates per stratum and per DM status reported throughout. ✓ |
| Results – Other Analyses | 17 | Report other analyses done — e.g. analyses of subgroups and interactions, and sensitivity analyses | §3.4 gender/age subgroup; §3.5 DM secondary analysis (pre-specified). ✓ |
| Discussion – Key Results | 18 | Summarise key results with reference to study objectives | §4 Discussion opens with five principal observations directly addressing study objectives. ✓ |
| Discussion – Limitations | 19 | Discuss limitations of the study, taking into account sources of potential bias or imprecision | §4.5 Limitations: single-centre, referral bias, sample size, follow-up, interrater reliability, no multivariate analysis, pre-hospital medication effect. ✓ |
| Discussion – Interpretation | 20 | Give a cautious overall interpretation of results considering objectives, limitations, multiplicity of analyses, and results from similar studies | §4.1–4.3: Results contextualised against Van Den Berg (meta-analysis), de Hoog (Asian cohorts), Reddy et al. (Indian data). ✓ |
| Discussion – Generalisability | 21 | Discuss the generalisability (external validity) of the study results | §4.4 and §5: Explicitly discusses applicability to Indian tertiary EDs. §4.5: Limitations discuss single-centre setting. ✓ |
| Other Information – Funding | 22 | Give the source of funding and the role of the funders for the present study and, if applicable, for the original study on which the present article is based | Declarations: 'No external funding was received for this study.' ✓ |

**Notes:**

† Items flagged in red represent areas where additional information may strengthen the submission:

• Item 13c: A participant flow diagram is recommended by STROBE; consider adding as an Additional File.

• Item 14b: Missing data for telephone follow-up not formally quantified; acknowledged in Limitations (§4.5).

All other items are fully addressed in the manuscript. This checklist was prepared by the corresponding author (NM) in accordance with the STROBE guidelines for observational cohort studies.

**Corresponding author:** Dr. Nikit Mittal | nikscorp175@gmail.com

**Date:** 30 March 2026
